# Supplementary material for: Spatial Access to Emergency Services in Low- and Middle-Income Countries: A GIS-Based Analysis
Source: PLoS One. 2015 Nov 3;10(11):e0141113. doi: 10.1371/journal.pone.0141113 (PMC4631370; doi:10.1371/journal.pone.0141113)
Supplement: S1 Table — Proportion of the population of Namibia and Haiti residing within a 50-kilometer Euclidean buffer around each facility (XLSX) [file pone.0141113.s001.xlsx]

## Sheet: Sheet1
	Level A	Level B	Level C
Country	50 Km
Haiti	1	0.75	0.74
Namibia	0.72	0.63	0.41
